# Supplementary material for: Cyclo-oxygenase-2 selective inhibitors and nonsteroidal anti-inflammatory drugs: balancing gastrointestinal and cardiovascular risk
Source: PubMed Central journal article supplement (PMC2001315; doi:10.1186/1471-2474-8-73), 2007-08-03
Supplement: 1471-2474-8-73-S1.pdf [file 1471-2474-8-73-S1.pdf]

Additional file 1: Summary of evidence of gastrointestinal events with coxibs

| Reference                                                | Study design                                                                                                             | Population                                                                   | Main outcomes                                                                   | Main results of study<br>Events reported, event rate per 100 patient<br>years, or percentage                                                                                 | Relative risk<br>(95% confidence<br>interval) | Exposure<br>Duration, patient<br>years of exposure,<br>patient years per<br>patient | Events per 100 py, number of events                                                                    |                                                    |
|----------------------------------------------------------|--------------------------------------------------------------------------------------------------------------------------|------------------------------------------------------------------------------|---------------------------------------------------------------------------------|------------------------------------------------------------------------------------------------------------------------------------------------------------------------------|-----------------------------------------------|-------------------------------------------------------------------------------------|--------------------------------------------------------------------------------------------------------|----------------------------------------------------|
|                                                          |                                                                                                                          |                                                                              |                                                                                 |                                                                                                                                                                              |                                               |                                                                                     | Complicated PUB                                                                                        | PUB and<br>symptomatic ulcer                       |
| <b>Large randomised trials</b>                           |                                                                                                                          |                                                                              |                                                                                 |                                                                                                                                                                              |                                               |                                                                                     |                                                                                                        |                                                    |
| Bombardier et al. N Engl J Med 2000 343: 1520-1528       | Randomised trial powered for PUB outcome, comparing 50 mg rofecoxib with 1000 mg naproxen daily                          | 8,076 patients with RA, at least 50 years                                    | Confirmed clinical upper GI events (perforation, bleeding symptomatic ulcer)    | 177 events, 53 complicated<br>Confirmed events at 2.1/100 pt years with rofecoxib, 4.5 with naproxen<br>Complicated 0.6 and 1.4 per 100 pt years                             | 0.5 (0.3 to 0.6)<br><br>0.4 (0.2 to 0.8)      | Median duration 9.0 months<br>R 3035 py<br>N 3022 py                                | R 0.6/100 py (16/4047)<br>N 1.4/100 py (37/4029)                                                       | R 2.1/100 py (56/4047)<br>N 4.5/100 py (121/4029)  |
| Silverstein et al. JAMA 2000 284: 1247-1255              | Randomised trial powered for PUB outcome, comparing 800 mg celecoxib with 2400 mg ibuprofen and 150 mg diclofenac daily  | 8,059 patients with OA or RA, ≥18 years                                      | Confirmed upper GI ulcers and complication (bleeding, perforation, obstruction) | 83 events including symptomatic ulcers, 35 complicated<br>Confirmed events at 2.1/100 pt years with celecoxib, 3.5 with NSAID<br>Complicated at 0.8 and 1.5 per 100 pt years | 0.6 (0.4 to 0.9)<br><br>0.5 (0.3 to 1.1)      | Duration 6 months<br>C 1441 py<br>N 1384 py                                         | C 2.2/100 py (32/3987)<br>N 3.7/100 py (51/3981)                                                       | C 2.1/100 py (30/3987)<br>N 3.5/100 py (49/3981)   |
| Schnitzer et al. Lancet 2004 364: 665-674                | Randomised trial powered for PUB outcome, comparing 400 mg lumiracoxib with 2400 mg ibuprofen and 1000 mg naproxen daily | 18,325 patients with OA, at least 50 years<br>13,506 py in safety evaluation | Confirmed upper GI ulcers and complication (bleeding, perforation, obstruction) | 283 events, 112 complicated<br>Confirmed events at 1.0% with lumiracoxib, 1.5% with NSAID<br>Complicated events at 0.3% with lumiracoxib, 0.9% with NSAID                    | 0.7 (0.5 to 0.8)<br><br>0.3 (0.2 to 0.5)      | L 6838 py<br>N 6845 py<br>(overall average 0.75 pypt)                               | L 0.42/100 py (29/9117)<br>N 1.20/100 py (83/9127)                                                     | L 0.95/100 py (87/9117)<br>N 2.0/100 py (186/9127) |
| <b>Meta-analyses of randomised trials</b>                |                                                                                                                          |                                                                              |                                                                                 |                                                                                                                                                                              |                                               |                                                                                     |                                                                                                        |                                                    |
| Langman et al. JAMA 1999 282: 1929-1933                  | Presecified meta-analysis of eight randomised trials of rofecoxib versus NSAIDs                                          | OA patients, mean age 63 years<br>n=5,435                                    | Confirmed clinical upper GI events (perforation, bleed, ulcer)                  | 35 confirmed complicated events<br>Complicated events at 1.3/100 pt years with rofecoxib, 2.6 with NSAID                                                                     | 0.5 (0.3 to 1.0)                              | R 1428 py (0.43 pypt)<br>N 615 py (0.39 pypt)<br>P 112 py (0.22 pypt)               | R 1.3/100 py (19/3357)<br>N 1.8/100 py (16/1564)<br>P 2.6/100 py (3/514, for shorter duration studies) |                                                    |
| Goldstein et al. Am J Gastroenterol 2000 95: 1681-1690   | Meta-analysis of 14 randomised trials of celecoxib versus NSAIDs                                                         | OA or RA patients, mean age 60 years<br>n=11,008                             | Confirmed clinical upper GI events (perforation, bleed, ulcer)                  | 11 confirmed complicated events<br>Complicated events at 0.2/100 pt years with celecoxib, 1.7 with NSAID                                                                     | 0.2 (0.1 to 0.5)                              | C 1020 py (0.16 pypt)<br>N 535 py (0.19 pypt)<br>P 208 py (0.11 pypt)               | C 0.2/100 py (2/6376)<br>N 1.7/100 py (9/2768)<br>P 0/100 py (0/1864)                                  |                                                    |
| Edwards et al. Pain 2004 111: 286-296                    | Meta-analysis of nine randomised trials of valdecoxib versus NSAIDs                                                      | OA or RA patients, n=5,726                                                   | Clinically significant upper GI bleed                                           | 10 confirmed complicated events<br>Complicated event rate 0.1% with valdecoxib, 0.4% with NSAID                                                                              | 0.2 (0.04 to 0.8)                             | Mean exposure not available (6/12/26 week trials)                                   | V 2/2733 (0.1% of patients)<br>N 8/1846 (0.4% of patients)                                             |                                                    |
| Goldstein et al. Aliment Pharmacol Ther 2004 20: 527-538 | Meta-analysis of eight randomised trials of valdecoxib versus NSAID                                                      | OA or RA patients, mean age 58 years<br>n=7,434                              | Confirmed clinical upper GI events (perforation, bleed, ulcer)                  | 88 symptomatic ulcers, 19 complicated<br>Symptomatic + complicated 0.8% with valdecoxib, 3.3% with NSAID<br>Complicated 0.2% with valdecoxib, 0.5% with NSAID                | 0.3 (0.2 to 0.4)<br><br>0.4 (0.1 to 0.9)      | V 1183 y (0.27 pypt)<br>N 563 y (0.27 pypt)                                         | V 0.68/100 py (8/4362)<br>N 1.94/100 py (11/2099)                                                      | V 2.7/100 py (32/4362)<br>N 11.8/100 py (69/2099)  |

|                                                    |                                                                       |                                                             |                                                                                                                 |                                                                                                                                            |                                                            |                                                                   |                                                                             |                                                  |
|----------------------------------------------------|-----------------------------------------------------------------------|-------------------------------------------------------------|-----------------------------------------------------------------------------------------------------------------|--------------------------------------------------------------------------------------------------------------------------------------------|------------------------------------------------------------|-------------------------------------------------------------------|-----------------------------------------------------------------------------|--------------------------------------------------|
| Hooper et al. BMJ 2004 329: 948                    | Meta-analysis of 17 randomised trials of coxibs versus NSAIDs         | n=25,564                                                    | Variety of outcomes reported, including serious gastrointestinal complications, and symptomatic ulcers          | 114 serious gastrointestinal complications, 0.36% with coxib, 0.73% with NSAID<br>288 symptomatic ulcers, 0.8% with coxib, 1.8% with NSAID | 0.5 (0.4 to 0.8)<br>0.5 (0.4 to 0.6)                       | Mean exposure not available                                       |                                                                             |                                                  |
| Watson et al. Curr Med Res Opin 2004 20: 1539-1548 | Meta-analysis of 20 randomised trials of rofecoxib versus NSAIDs      | OA or RA patients, n=10,026 rofecoxib, 7,046 NSAID          | Confirmed and investigator reported PUBs, and complicated                                                       | 97 confirmed PUBs, 0.43% with rofecoxib, 0.76% with NSAIDs                                                                                 | Confirmed 0.4 (0.2 to 0.5)<br>Complicated 0.4 (0.2 to 0.9) | R 5849 y (0.58 pypt)<br>N 2889 y (0.41 pypt)                      | R 0.21/100 py (12/10026)<br>N 0.45/100 py (13/7046)                         |                                                  |
| Moore et al. Arth Res Ther 2005 7: R644-R655       | Meta-analysis of 31 randomised trials of celecoxib versus NSAIDs      | OA or RA n=39,605 (31,171 in analysis of ulcers and bleeds) | Variety of outcomes reported including clinical ulcers and bleeds                                               | 184 clinical ulcers or bleeds, 0.4% with celecoxib, 0.9% with NSAID                                                                        | 0.6 (0.5 to 0.8)                                           | C 7943 py<br>N 5258 py<br>P 441 py<br>overall exposure 0.42 pypt) | C 0.9/100py (74/18756)<br>N 2.1/100 py (110/12415)<br>P 0.2/100 py (1/2859) |                                                  |
| Ramey et al. Curr Med Res Ther 2005 21: 715-722    | Meta-analysis of 10 randomised trials involving etoricoxib and NSAIDs | OA, RA, ankylosing spondylitis n=5,441                      | Variety of outcomes reported, including all PUB and complicated PUB, both investigator reported and adjudicated | 111 investigator reported PUBs<br>95 confirmed PUBs, 1.2% with etoricoxib, 2.5% with NSAID                                                 | 0.5 (0.3 to 0.7)                                           | E 1.24 pypt<br>N 1.00 pypt                                        | E 0.47/100 py (19/3226)<br>N 1.03/100 py (23/2215)                          | E 1.0/100 py (40/3226)<br>N 2.5/100 py (55/2215) |

#### Large observational studies

|                                                        |                                     |                                                                                                                                 |                                                                |                                                                                                                                                                                               |                                                                                                  |                                                                   |                                                                                                                   |  |
|--------------------------------------------------------|-------------------------------------|---------------------------------------------------------------------------------------------------------------------------------|----------------------------------------------------------------|-----------------------------------------------------------------------------------------------------------------------------------------------------------------------------------------------|--------------------------------------------------------------------------------------------------|-------------------------------------------------------------------|-------------------------------------------------------------------------------------------------------------------|--|
| Mamdani et al. BMJ 2002 325: 624-630                   | Observational cohort study          | Users of NSAID, coxib, or non users. Total population about 144,000<br>Rofecoxib 92% ≤25 mg daily; celecoxib 80% ≤200 mg daily) | Hospital admission for upper GI bleeding                       | 82 events with controls, 17 with NSAID, 75 with coxib<br><br>Rofecoxib, but not celecoxib had significantly greater association with bleeding than controls                                   | Celecoxib compared with NSAID 0.2 (0.1 to 0.4)<br>Rofecoxib compared with NSAID 0.5 (0.3 to 1.0) | Coxib 14683 py (Cele 8818 Rofe 5865)<br>N 1353<br>Community 37981 | C 0.4/100 py (32/18908)<br>R 0.7/100 py (43/14583)<br>N 1.3/100 py (17/1353)<br>Community 0.2/100 py (82/100,000) |  |
| MacDonald et al. Gut 2003 52: 1265-1270                | Retrospective cohort analysis       | Users of NSAID, coxibs, and non users. Total 26,000 incident cases of upper GI haemorrhage                                      | Hospital admission for upper GI bleeding in high risk patients | 2,875 events on NSAID, 4 on coxib<br>Adjusted relative risk                                                                                                                                   | 0.4 (0.1 to 1.0)                                                                                 | Control 3136000 py<br>Coxibs 1600 py<br>N 635000 py               | Control 0.08/100 py (2397 events)<br>Coxibs 0.26/100 py (4 events)<br>N 0.46/100 py (2911 events)                 |  |
| Norgard et al. Aliment Pharmacol Ther 2004 19: 817-825 | Population based case-control study | Users of NSAID, coxibs, and non users. 780 incident cases in patients with high risk of GI bleeding                             | Hospital admission for upper GI bleeding                       | 35 patients had been exposed to coxib (4.5%)<br>97 patients had been exposed to NSAID (12%)<br>Rofecoxib, but not celecoxib had significantly greater association with bleeding than controls | 0.4 (0.3 to 0.5)                                                                                 | Not applicable                                                    |                                                                                                                   |  |

Abbreviations: PUB - perforations, ulcers, bleeds; OA - osteoarthritis; RA - rheumatoid arthritis; GI - gastrointestinal; n - number of patients; pt - patient; py - patient year; pypt - patient years per patient; R - rofecoxib; C - celecoxib; E - etoricoxib; V - valdecoxib; L - lumiracoxib; N - NSAID; P - placebo
