# Supplementary material for: Cyclo-oxygenase-2 selective inhibitors and nonsteroidal anti-inflammatory drugs: balancing gastrointestinal and cardiovascular risk
Source: PubMed Central journal article supplement (PMC2001315; doi:10.1186/1471-2474-8-73), 2007-08-03
Supplement: 1471-2474-8-73-S2.pdf [file 1471-2474-8-73-S2.pdf]

Additional file 2: Summary of evidence of cardiovascular events with coxibs

Events per 100 py, number of events, or percentage

| Reference                                                                              | Study design                                                                                                                                                 | Population                                                                                                                                                   | Main outcomes                                                 | Statistical outcome                                                                                                                                      | Exposure Duration, patient years of exposure, patient years per patient                                                             | Events per 100 py, number of events, or percentage                                                                                                                                                                                                            |                                                                                                                                                                             |                                                                                                                              |                                                                                                          |                                                                                                                               |                                          |
|----------------------------------------------------------------------------------------|--------------------------------------------------------------------------------------------------------------------------------------------------------------|--------------------------------------------------------------------------------------------------------------------------------------------------------------|---------------------------------------------------------------|----------------------------------------------------------------------------------------------------------------------------------------------------------|-------------------------------------------------------------------------------------------------------------------------------------|---------------------------------------------------------------------------------------------------------------------------------------------------------------------------------------------------------------------------------------------------------------|-----------------------------------------------------------------------------------------------------------------------------------------------------------------------------|------------------------------------------------------------------------------------------------------------------------------|----------------------------------------------------------------------------------------------------------|-------------------------------------------------------------------------------------------------------------------------------|------------------------------------------|
|                                                                                        |                                                                                                                                                              |                                                                                                                                                              |                                                               |                                                                                                                                                          |                                                                                                                                     | Mortality                                                                                                                                                                                                                                                     | APTC endpoint (fatal and non-fatal MI and stroke, plus cardiovascular death)                                                                                                | MI                                                                                                                           | Non-fatal MI                                                                                             | Stroke                                                                                                                        | Non-fatal Stroke                         |
| <b>Large randomised trials</b>                                                         |                                                                                                                                                              |                                                                                                                                                              |                                                               |                                                                                                                                                          |                                                                                                                                     |                                                                                                                                                                                                                                                               |                                                                                                                                                                             |                                                                                                                              |                                                                                                          |                                                                                                                               |                                          |
| Bombardier et al. N Engl J Med 2000 343: 1520-1528                                     | Randomised trial powered for PUB outcome, comparing 50 mg rofecoxib with 1000 mg naproxen daily                                                              | 8,076 patients with RA, at least 50 years                                                                                                                    |                                                               | Significant increased risk of MI with rofecoxib                                                                                                          | Median duration 9.0 months<br>R 3035 py<br>N 3022 py                                                                                | R 0.67/100 py (0.5%)<br>N 0.53/100 py (0.4%)<br>Cardiovascular death<br>R 0.27/100 py (0.2%)<br>N 0.27/100 py (0.2%)                                                                                                                                          | R 0.53/100 py (0.4%)<br>N 0.13/100 py (0.1%)                                                                                                                                |                                                                                                                              | R 0.27/100 py (0.2%)<br>N 0.27/100 py (0.2%)                                                             |                                                                                                                               |                                          |
| Silverstein et al. JAMA 2000 284: 1247-1255                                            | Randomised trial powered for PUB outcome, comparing 800 mg celecoxib with 2400 mg ibuprofen and 150 mg diclofenac daily                                      | 8,059 patients with OA or RA, ≥18 years                                                                                                                      |                                                               | No significant difference                                                                                                                                | Duration 6 months<br>C 1441 py<br>N 1384 py                                                                                         |                                                                                                                                                                                                                                                               | C 0.50/100 py (10/3987)<br>N 0.56/100 py (11/3981)                                                                                                                          |                                                                                                                              | C 0.26/100 py (5/3987)<br>N 0.5/100 py (10/3981)                                                         |                                                                                                                               |                                          |
| Farkouh et al. Lancet 2004 364: 675-684                                                | Randomised trial powered for PUB outcome, comparing 400 mg lumiracoxib with 2400 mg ibuprofen and 1000 mg naproxen daily                                     | 18,325 patients with OA, at least 50 years<br>13,506 py in safety evaluation                                                                                 |                                                               | No significant difference                                                                                                                                | 52 weeks (0.75 pypt)                                                                                                                | L 23/9156 (0.25%)<br>N 22/9169 (0.24%)<br>Cardiovascular death<br>L 19/9156 (0.21%)<br>N 18/9169 (0.20%)                                                                                                                                                      | L 1.15/100 py (59/9156)<br>N 1.0/100 py (50/9169)                                                                                                                           | L 23/9156 (0.25%)<br>N 17/9169 (0.19%)                                                                                       | L 18/9156 (0.20%)<br>N 9/9169 (0.10%)                                                                    | L 24/9156 (0.25%)<br>N 23/9169 (0.24%)                                                                                        | L 20/9156 (0.22%)<br>N 20/9169 (0.22%)   |
| Cannon et al. Lancet 2006 online publication Nov 13: DOI:10.1016/S0140-6736(06)96666-9 | Prespecified pooled analysis of three randomised trials powered for cardiovascular outcomes comparing etoricoxib 60 mg or 90 mg with diclofenac 150 mg daily | 34,701 patients with OA or RA followed for an average of 18 months and >50,000 patient years of observation                                                  | Thrombotic events, Arterial thrombotic events, APTC events    | No significant difference                                                                                                                                | Median duration 19 months<br>E 25836<br>D 24766                                                                                     | Cardiovascular deaths<br>E 37/25836 (1.3%)<br>D 26/24766 (1.0%)                                                                                                                                                                                               | E 231/26402 (0.87%)<br>D 232/25416 (0.91%)                                                                                                                                  | E 111/26402 (0.42%)<br>D 122/25416 (0.48%)                                                                                   | E 105/26402 (0.40%)<br>D 105/25416 (0.41%)                                                               | E 89/26402 (0.33%)<br>D 79/25416 (0.31%)                                                                                      | E 83/26402 (0.31%)<br>D 77/25416 (0.29%) |
| <b>Meta-analyses of randomised trials</b>                                              |                                                                                                                                                              |                                                                                                                                                              |                                                               |                                                                                                                                                          |                                                                                                                                     |                                                                                                                                                                                                                                                               |                                                                                                                                                                             |                                                                                                                              |                                                                                                          |                                                                                                                               |                                          |
| Matchaba et al. Clin Ther 2005 27: 1196-1214                                           | Meta-analysis of all lumiracoxib studies in arthritis longer than 1 week                                                                                     | 22 RCTs in arthritis with 34,668 patients, 22,781 in trials of one year. Mean age 62 years, over 50% hypertension at baseline, 6% diabetes                   | Lumiracoxib doses 100-800 mg daily<br>APTC endpoint           | No significant differences by type of comparator, duration, prospective adjudication, or dose of lumiracoxib                                             | 0.19 pypt placebo trials<br>L 1332 py<br>P 614 py<br>0.65 pypt active trials<br>L 7859 py<br>N 6805 py                              | L 1.1/100 py (15/7011)<br>P 1.0/100 py (6/3234)<br>L 0.92/100 py (72/12090)<br>N 0.82/100 py (55/10469)                                                                                                                                                       | L 0.45/100 py (6/7011)<br>P 0.33/100 py (2/3234)<br>L 0.37/100 py (29/12090)<br>N 0.29/100 py (20/10469)                                                                    |                                                                                                                              | L 0.30/100 py (4/7011)<br>P 0.49/100 py (3/3234)<br>L 0.37/100 py (29/12090)<br>N 0.31/100 py (21/10469) |                                                                                                                               |                                          |
| Simon et al. Arthritis Rheum 2005 52: S406                                             | Meta-analysis of all celecoxib studies of 2 weeks to 3 years                                                                                                 | 41 RCTS, mainly in arthritis but including AS, back pain, and Alzheimer's disease<br>44,308 patients, 24,993 on celecoxib, 4,057 on placebo, 13,990 on NSAID | APTC endpoint, with main analysis for ≥200 mg celecoxib daily | No significant differences by type of comparator, except for stroke, where a significantly lower event rate was found for celecoxib compared with NSAIDs | Placebo comparator<br>P 585 py (0.14 pypt)<br>C 1268 py (0.17 pypt)<br>NSAID comparator<br>C 5651 (0.29 pypt)<br>N 4386 (0.31 pypt) | P 1.0/100 py (6/4025)<br>C 1.3/100 py (17/7462)<br>Cardiovascular death<br>P 0.51/100 py (3/4025)<br>C 0.87/100 py (11/7462)<br>NSAID comparisons<br>C 0.67/100 py (30/19773)<br>N 0.75/100 py (33/13990)<br>Cardiovascular death<br>C 0.27/100 py (15/19773) | P 1.4/100 py (8/4025)<br>C 1.8/100 py (23/7462)<br>NSAID comparisons<br>C 1.0/100 py (57/19773)<br>N 1.2/100 py (54/13990)<br>NSAID comparisons<br>N 0.68/100 py (42/13990) | P 0.68/100 py (4/4025)<br>C 1.3/100 py (16/7462)<br>NSAID comparisons<br>C 1.1/100 py (62/19773)<br>N 0.75/100 py (33/13990) |                                                                                                          | P 1.0/100 py (6/4025)<br>C 0.87/100 py (11/7462)<br>NSAID comparisons<br>C 0.27/100 py (15/19773)<br>N 0.75/100 py (33/13990) |                                          |
| White et al. Am J Ther 2004 11: 244-250                                                | Meta-analysis of all valdecoxib studies of at least 4 weeks                                                                                                  | RCTs for arthritis, with 7934 patients<br>4531 on valdecoxib, 1142 on placebo, 2261 on NSAIDs<br>Mean age about 70 years, with 45% history of CV disease     | Doses of valdecoxib 10 to 80 mg daily                         | No significant difference by dose, or by duration                                                                                                        | Placebo 161 py (0.14 pypt)<br>Valdecoxib 1340 py (0.30 pypt)<br>NSAID 656 py (0.29 pypt)                                            | P 0.00/100 py (0/1142)<br>V 0.51/100 py (7/4531)<br>N 0.76/100 py (5/2261)<br>Cardiovascular deaths<br>P 0.00/100 py (0/1142)<br>V 0.30/100 py (4/4531)<br>N 0.45/100 py (3/2261)                                                                             | Serious CV thrombotic event<br>P 0.46/100 py (1/1142)<br>V 1.25/100 py (2/1142)<br>N 1.27/100 py (17/4531)<br>N 1.07/100 py (7/2261)                                        | V 0.43/100 py (6/4531)<br>N 1.07/100 py (7/2261)                                                                             |                                                                                                          | P 0.46/100 py (1/1142)<br>V 0.60/100 py (8/4531)<br>N 0.76/100 py (5/2261)                                                    |                                          |

|                                                      |                                                                                          |                                                                                                                                                                                                      |                                                                           |                                                                                                               |                                                                                                                                            |                                                                               |                                                                                                                                                                             |                                                                                                                                                      |                                                                                                                                                     |
|------------------------------------------------------|------------------------------------------------------------------------------------------|------------------------------------------------------------------------------------------------------------------------------------------------------------------------------------------------------|---------------------------------------------------------------------------|---------------------------------------------------------------------------------------------------------------|--------------------------------------------------------------------------------------------------------------------------------------------|-------------------------------------------------------------------------------|-----------------------------------------------------------------------------------------------------------------------------------------------------------------------------|------------------------------------------------------------------------------------------------------------------------------------------------------|-----------------------------------------------------------------------------------------------------------------------------------------------------|
| Konstam et al. Circulation 2001 104: 2280-2288       | Meta-analysis of rofecoxib studies of at least four weeks, with longest duration 4 years | RCTs on arthritis, back pain, and Alzheimer's disease<br>Mean age 54 to 73 years in study groups, about half with one coronary risk factor                                                           | Doses of rofecoxib 12.5 to 50 mg APTC endpoint                            | No significant difference by condition, or comparator (excepting just, naproxen), with possible dose-response | Placebo controlled<br>R 2189 py (0.35 pypt)<br>P 1678 py (0.48 pypt)<br>NSAID controlled<br>R 6556 py (0.48 pypt)<br>N 4726 py (0.44 pypt) |                                                                               | Placebo controlled<br>R 1.5/100 py (33/6290)<br>P 1.9/100 py (32/3482)<br>NSAID controlled<br>R 1.2/100 py (78/13632)<br>N 0.87/100 py (41/10625)                           | Placebo controlled<br>R 0.86/100 py (19/6290)<br>P 0.77/100 py (13/3482)<br>NSAID controlled<br>R 0.78/100 py (51/13632)<br>N 0.45/100 py (21/10625) | Placebo controlled<br>R 0.36/100 py (8/6290)<br>P 0.90/100 py (15/3482)<br>NSAID controlled<br>R 0.38/100 py (25/13632)<br>N 0.41/100 py (19/10625) |
| Curtis et al. Arthritis Rheum 2003 48(suppl 9): 1600 | Meta-analysis of etoricoxib studies of at least 4 weeks                                  | Over 6,700 patients, predominantly in arthritis, ankylosing spondylitis and back pain                                                                                                                | Does of etoricoxib ≥60 mg daily<br>Thrombotic serious adverse experiences | No significant difference between etoricoxib, placebo, or NSAIDs                                              | Placebo controlled<br>E 560 py (0.20 pypt)<br>P 335 py (0.19 pypt)<br>NSAID controlled<br>E 4002 py (1.2 pypt)<br>N 2228 py (1.0 pypt)     |                                                                               | Serious CV thrombotic event<br>Placebo controlled<br>E 1.3/100 py (7/2818)<br>P 1.2/100 py (4/1767)<br>NSAID controlled<br>E 1.1/100 py (46/3226)<br>N 0.8/100 py (18/2215) | E 0.35/100 py (2/2818)<br>P 0.0/100 py (0/1767)<br>NSAID controlled<br>E 0.42/100 py (17/3226)<br>N 0.31/100 py (7/2215)                             | E 0.53/100 py (3/2818)<br>P 0.60/100 py (2/1767)<br>NSAID controlled<br>E 0.35/100 py (14/3226)<br>N 0.18/100 py (4/2215)                           |
| Kearney et al. BMJ 2006 332: 1302-1308               | Meta-analysis of all coxib vs NSAID or placebo trials of at least 4 weeks                | 145,373 patients, predominantly in arthritic conditions, but including colorectal polyp prevention and Alzheimer's<br>Note, large difference in polyp studies, no difference in Alzheimer's studies) | Serious vascular events (MI, stroke, vascular death)                      | Overall, no significant difference between coxib and NSAID. Lower rates for naproxen                          | Coxib 18490 py<br>NSAID 12639 py                                                                                                           | Vascular death:<br>Coxib 0.3/100 py (60/18490)<br>NSAID 0.2/100 py (30/12639) | Coxib 1.2/100py (216/18490)<br>NSAID 0.9/100 py (112/12639)                                                                                                                 | Coxib 0.6/100py (113/18490)<br>NSAID 0.3/100 py (42/12639)                                                                                           | Coxib 0.4/100py (70/18490)<br>NSAID 0.4/100 py (53/12639)                                                                                           |

#### Large observational studies

|                                                                     |                                                                                                                                 |                                                                                                                                                                                                                                                               |                                                              |                                                                                                                                                                          |                                                                                                                                              |  |                                                                                                                                                    |                                                                                                                                                                                                                                                                                |  |
|---------------------------------------------------------------------|---------------------------------------------------------------------------------------------------------------------------------|---------------------------------------------------------------------------------------------------------------------------------------------------------------------------------------------------------------------------------------------------------------|--------------------------------------------------------------|--------------------------------------------------------------------------------------------------------------------------------------------------------------------------|----------------------------------------------------------------------------------------------------------------------------------------------|--|----------------------------------------------------------------------------------------------------------------------------------------------------|--------------------------------------------------------------------------------------------------------------------------------------------------------------------------------------------------------------------------------------------------------------------------------|--|
| Mamdani et al. Arch Intern Med 2003 163: 481-486                    | Users of NSAID, coxib, or non users. Total population about 167,000<br>Rofecoxib 92% ≤25 mg daily; celecoxib 80% ≤200 mg daily) | Patients aged >65 years<br>Users of coxib and NSAIDs were more likely to have had hospital admission in past year, use more drugs (ACEI, aspirin, hypoglycaemic, CCB, diuretics, oestrogen, lipid lowering drugs, and nitrates), and have lower income status | Hospital admission for acute myocardial infarction           | No significant difference between nonusers and users of coxibs or NSAIDs                                                                                                 | Controls 51194 py (0.51 pypt)<br>C 7004 py (0.46 pypt)<br>R 4806 (0.40 pypt)<br>NSAID 12644 (0.32 pypt)                                      |  |                                                                                                                                                    | Control 0.82/100 py (419/100,000)<br>C 1.1/100 py (75/15271)<br>R 1.2/100 py (58/12156)<br>N 1.2/100 py (149/39537)                                                                                                                                                            |  |
| Ray et al. Lancet 2002 360: 1071-1073                               | Users of NSAID, coxib, or non users. Total population about 378,000<br>Rofecoxib by dose ≤25 mg daily or >25 mg                 | Patients aged 50-84 years, not in nursing home, no history of non-CV life threatening illness<br>Users of coxibs and NSAIDs were to have major CV diseases, with treatment in last year, be taking a CV drug, or corticosteroids, have more prescriptions     | Acute myocardial infarction and fatal coronary heart disease | Significant difference only for rofecoxib>25 mg daily                                                                                                                    | Controls 237975 py (1.18 pypt)<br>Ibu 16330 py (0.28 pypt)<br>Nap 21093 py (0.30 pypt)<br>C 5643 py (0.25 pypt)<br>R ≤25 4037 py (0.20 pypt) |  | Control 1.3/100 py (3085/202916)<br>Ibu 1.2/100 py (190/59007)<br>Nap 1.2/100 py (245/70384)<br>C 1.3/100 py (74/22337)<br>R 1.4/100 py (55/20245) |                                                                                                                                                                                                                                                                                |  |
| Hernandez-Diaz et al. Basic Clin Pharmacol Toxicol 2006 98: 266-274 | Meta-analysis of studies of users of NSAID, coxib or non-users                                                                  | Patients predominantly >40 years. Most frequent indication was OA. NSAID users more likely to have CV risk factors than non-users: coxib users had more CV risk factors than NSAID or non-users. All studies attempted to adjust for confounders              | Myocardial infarction                                        | Significant increase for rofecoxib (dose response) and diclofenac, and possibly for ibuprofen. Possible small decrease for naproxen without concomitant low dose aspirin | Total population approximately 3.5 million, with about 68,000 Mis                                                                            |  |                                                                                                                                                    | From all studies, compared with nonuse, RR for use (fixed effects) were:<br>All NSAIDs 1.1 (1.06 to 1.13)<br>Naproxen 0.98 (0.92 to 1.05)<br>Ibuprofen 1.07 (1.02 to 1.12)<br>Diclofenac 1.44 (1.32 to 1.56)<br>Celecoxib 0.96 (0.90 to 1.02)<br>Rofecoxib 1.26 (1.17 to 1.36) |  |

Abbreviations: RCT - randomised controlled trial; OA - osteoarthritis; RA - rheumatoid arthritis; CV - cardiovascular; ACEI - angiotensin converting enzyme inhibitor; CCB - calcium channel blocker; APTC - antiplatelet trialist collaboration; n = number of patients; pt - patient; py - patient year; pypt - patient years per patient; R - rofecoxib; C - celecoxib; E - etoricoxib; V - valdecoxib; L - lumiracoxib; N - NSAID; P - placebo; Ibu - ibuprofen; Nap - naproxen
