# Supplementary material for: Cyclo-oxygenase-2 selective inhibitors and nonsteroidal anti-inflammatory drugs: balancing gastrointestinal and cardiovascular risk
Source: PubMed Central journal article supplement (PMC2001315; doi:10.1186/1471-2474-8-73), 2007-08-03
Supplement: 1471-2474-8-73-S3.pdf [file 1471-2474-8-73-S3.pdf]

**Additional file 3: Data and calculations for myocardial infarction with and without low dose aspirin in association with coxib and NSAID**

**Data**

| Trial                                            | Coxib       | NSAID      | Number of Mis | Number of patients | Patient years of exposure | Number of Mis | Number of patients | Patient years of exposure | Average years on treatment |              |
|--------------------------------------------------|-------------|------------|---------------|--------------------|---------------------------|---------------|--------------------|---------------------------|----------------------------|--------------|
| <b>All patients</b>                              |             |            |               |                    |                           |               |                    |                           |                            |              |
|                                                  |             |            | <b>Coxib</b>  |                    |                           | <b>NSAID</b>  |                    |                           | <b>Coxib</b>               | <b>NSAID</b> |
| Class                                            | Celecoxib   | Ibuprofen  | 7             | 1997               | 722                       | 7             | 1985               | 690                       | 0.36                       | 0.35         |
| Class                                            | Celecoxib   | Diclofenac | 11            | 1990               | 719                       | 4             | 1996               | 694                       | 0.36                       | 0.35         |
| Vigor                                            | Rofecoxib   | Naproxen   | 20            | 4047               | 3035                      | 4             | 4029               | 3022                      | 0.75                       | 0.75         |
| Target                                           | Lumiracoxib | Ibuprofen  | 5             | 4376               | 3326                      | 7             | 4397               | 3034                      | 0.76                       | 0.69         |
| Target                                           | Lumiracoxib | Naproxen   | 18            | 4741               | 3651                      | 10            | 4730               | 3595                      | 0.77                       | 0.76         |
| Medal                                            | Etoricoxib  | Diclofenac | 111           | 16833              | 25858                     | 122           | 16504              | 24797                     | 1.54                       | 1.50         |
| <b>Patients not taking low dose aspirin</b>      |             |            |               |                    |                           |               |                    |                           |                            |              |
|                                                  |             |            | <b>Coxib</b>  |                    |                           | <b>NSAID</b>  |                    |                           | <b>Coxib</b>               | <b>NSAID</b> |
| Class                                            | Celecoxib   | Ibuprofen  | 6             | 1574               | 569                       | 2             | 1567               | 545                       | 0.36                       | 0.35         |
| Class                                            | Celecoxib   | Diclofenac | 7             | 1580               | 571                       | 2             | 1602               | 557                       | 0.36                       | 0.35         |
| Vigor                                            | Rofecoxib   | Naproxen   | 20            | 4047               | 3035                      | 4             | 4029               | 3022                      | 0.75                       | 0.75         |
| Target                                           | Lumiracoxib | Ibuprofen  | 4             | 3401               | 2585                      | 5             | 3431               | 2367                      | 0.76                       | 0.69         |
| Target                                           | Lumiracoxib | Naproxen   | 10            | 3549               | 2733                      | 4             | 3537               | 2688                      | 0.77                       | 0.76         |
| Medal                                            | Etoricoxib  | Diclofenac | 65            | 11104              | 17057                     | 61            | 10918              | 16404                     | 1.54                       | 1.50         |
| <b>Patients who were taking low dose aspirin</b> |             |            |               |                    |                           |               |                    |                           |                            |              |
|                                                  |             |            | <b>Coxib</b>  |                    |                           | <b>NSAID</b>  |                    |                           | <b>Coxib</b>               | <b>NSAID</b> |
| Class                                            | Celecoxib   | Ibuprofen  | 1             | 423                | 153                       | 5             | 418                | 145                       | 0.36                       | 0.35         |
| Class                                            | Celecoxib   | Diclofenac | 4             | 410                | 148                       | 2             | 394                | 137                       | 0.36                       | 0.35         |
| Vigor                                            | Rofecoxib   | Naproxen   | 0             | 0                  | 0                         | 0             | 0                  | 0                         | 0.75                       | 0.75         |
| Target                                           | Lumiracoxib | Ibuprofen  | 1             | 975                | 741                       | 2             | 966                | 667                       | 0.76                       | 0.69         |
| Target                                           | Lumiracoxib | Naproxen   | 8             | 1192               | 918                       | 6             | 1193               | 907                       | 0.77                       | 0.76         |
| Medal                                            | Etoricoxib  | Diclofenac | 46            | 5729               | 8801                      | 61            | 5586               | 8393                      | 1.54                       | 1.50         |
